# Supplementary material
Source: Research Square preprint supplement (doi:10.21203/rs.3.rs-10209338/v1)
Supplement: Supplementary file 1 [file 5672d3c07b842f66e4279554.docx]

Table S1 The sequences of qRT-PCR primers

| genes | Primer sequence（5′-3′） | Accession number. |
| --- | --- | --- |
| *β*-actin | F: CCCGTTGGTCCCAGAACTTTGAG  R: CCACTTCACGACGAGAATCAGGAG | NM_173979.3 |
| *IL-1β* | F: CGACTGCCTTCCCTGCATTA  R: TCTGGGAGGAGGGGATTGTT | NM_174093.1 |
| *IL-6* | F: CCAGCCACAAACACTGACCT  R: CCCCAGCTACTTCATCCGAA | NM_173923.2 |
| *IL-8* | F: ATGACTTCCAAGCTGGCTGTT  R: GGTTTAGGCAGACCTCGTTTC | NM_173925.2 |
| *TNF-α* | F: GCTCTCTCTCACATACCCTGC  R: ATCCCGGATCATGCTTTTGGT | NM_173966.3 |
| *TGM2* | F: GATGAGGAGCGGCAAGAATAC  R: GCCCAAAATTCCAAGGTATGTTC | NM_177507.2 |

Table S2 The RNA interference target sequence of TGM2

| NO. | Target Seq |
| --- | --- |
| NC | TTCTCCGAACGTGTCACGT |
| shRNA502 | AGATGAGGAGCGGCAAGAATA |
| shRNA930 | CCCGAGTCGTGACCAACTATA |
| shRNA1269 | ACGATGGGTCTCTGCACAAAT |
